# Supplementary material
Source: publisher site journal article supplement (https://www.dovepress.com/article/579576)
Supplement: Supplementary file 1 [file 579576%20Revised%20Supplementary%20materials.pdf]

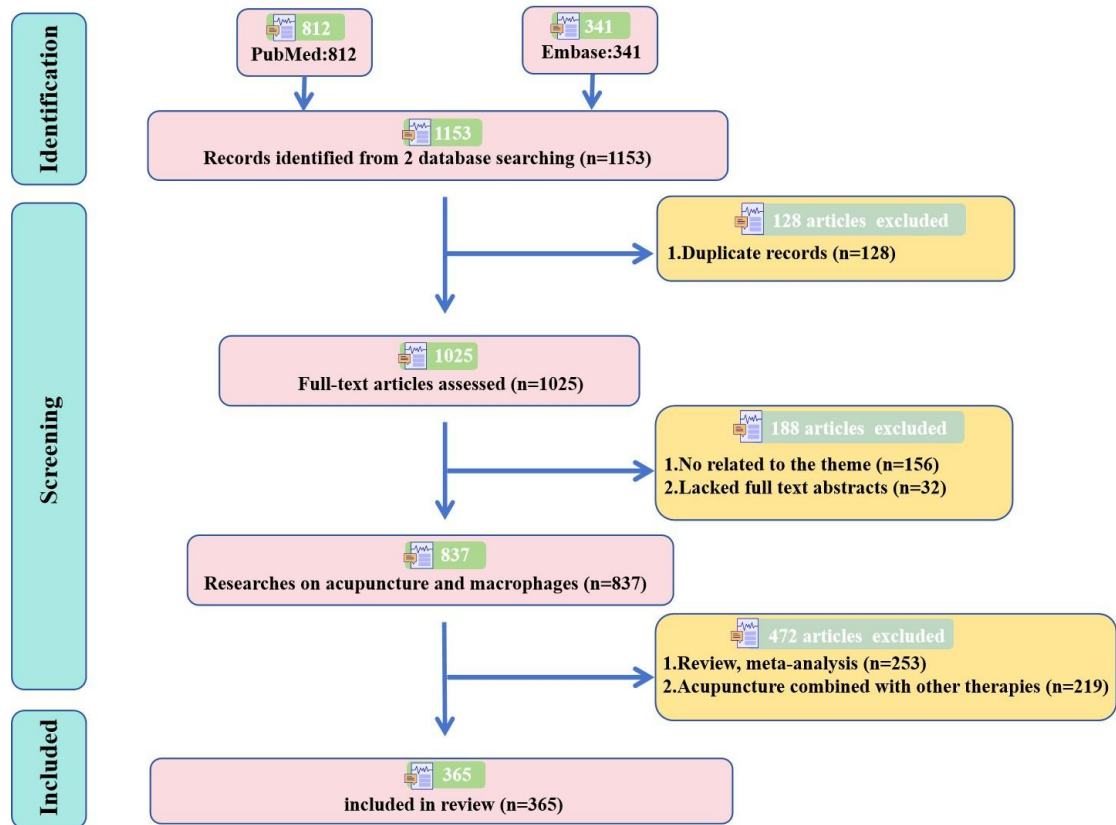

**Supplementary Figure 1. Flow chart of the search strategy and process**

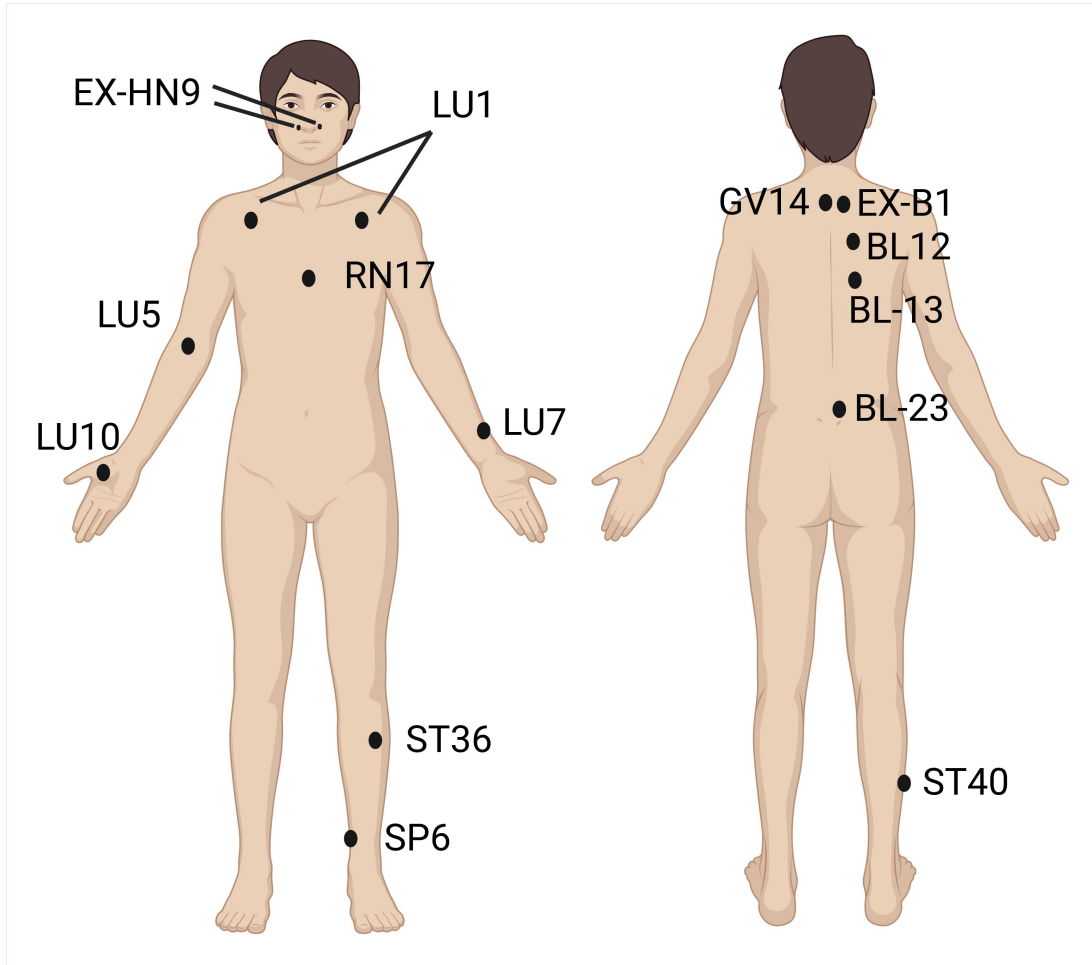

Supplementary Figure 2. The commonly used acupoint map of acupuncture for treating allergic diseases. The black origin represents the key acupoint area.
